# Supplementary material for: Allele-specific expression in a family quartet with autism reveals mono-to-biallelic switch and novel transcriptional processes of autism susceptibility genes
Source: PubMed Central journal article supplement (PMC5844893; doi:10.1038/s41598-018-22753-4), 2018-03-09
Supplement: 41598_2018_22753_MOESM1_ESM.pdf [file 41598_2018_22753_MOESM1_ESM.pdf]

1 **Allele-specific Expression in a Family Quartet**  
2 **with Autism Reveals Mono-to-biallelic Switch**  
3 **and Novel Transcriptional Processes of Autism**  
4 **Susceptibility Genes**

5  
6 Chun-Yen Lin<sup>1,2</sup>, Kai-Wei Chang<sup>1</sup>, Chia-Yi Lin<sup>1</sup>, Jia-Ying Wu<sup>1</sup>, Hilary Coon<sup>3</sup>, Pei-Hsin  
7 Huang<sup>4</sup>, Hong-Nerng Ho<sup>5,6</sup>, Schahram Akbarian<sup>7</sup>, Susan Shur-Fen Gau<sup>1,8</sup>, and Hsien-  
8 Sung Huang<sup>1,9,#</sup>

9  
10 **SUPPLEMENTARY METHOD, FIGURE AND TABLE LEGENDS AND REFERENCES**

11 **Analysis of different regions of normal human postmortem brains and spinal cords.**

12 Samples from normal human subjects are as follows: BA8 of prefrontal cortex is from  
13 GSE102556; BA10 of prefrontal cortex is from GSE17612; cerebellum and frontal cortex  
14 are from GSE36192, 20 random samples of each, out of > 400 samples each); amygdala,  
15 caudate nucleus and spinal cord are from GSE2361. Microarray samples were  
16 normalized by subtracting background signals. For the RNA-seq samples, the minimum  
17 expression was arbitrarily set to 0.001 FPKM. Genes listed in all platforms were used for  
18 analysis. We used centered log<sub>2</sub> signal to evaluate data distribution for cross-platform  
19 comparativity. The samples were then quantile normalized. Principal component analysis

1 (PCA), heatmap plots and volcano plot analysis via RStudio<sup>1</sup> were used to evaluate the  
2 similarity between BA8 and BA10 regions.

3 **Comparison of our altered genes and miRNAs between our study cohort and**  
4 **another ASD cohort.** The other ASD cohort was obtained from Dr. Weinberger's group<sup>2</sup>.  
5 We used GRCh38 reference genome and Ensembl 90 for transcriptomic analysis. We  
6 used the STAR 2.5.1 program for mapping. The Cuffdiff program was used for expression  
7 analysis.

8 **Supplementary Figure 1. The detailed pedigree of the family quartet with ASD.**  
9 Square shape indicates male and circle shape indicates female. Diamond shape indicates  
10 unknown gender. The quartet samples for this study are highlighted with a red rectangle.

11 **Supplementary Figure 2. (a)** Quality of DNA from each family member was determined  
12 using an Agilent 2100 Bioanalyzer. The ratio of Qubit to NanoDrop concentrations was  
13 larger than 0.67 for all four samples. Concentration of DNA was > 5 µg for all four samples.  
14 Y-axis indicates the sample intensity. **(b)** RNA profiles for the two offspring were  
15 generated on an Agilent 2100 Bioanalyzer to determine RNA integrity number (RIN). The  
16 RIN was 5.6 for the non-ASD offspring and 5.1 for the offspring with ASD, which was  
17 greater than the minimal RIN (3.95) for good quality human postmortem brain RNA<sup>3,4</sup>.  
18 The RNA concentration used was > 5 µg for the two offspring. The Y-axis indicates the  
19 sample intensity.

20 **Supplementary Figure 3. Comparison of expression of altered genes and miRNAs**  
21 **in our study cohort and another ASD cohort. (a)** Altered genes are from Fig. 1b. **(b)**  
22 Altered miRNAs are from Fig. 1e. **(c)** Altered genes are from Fig. 2a. ASD and Non-ASD

1 are samples from our cohort. C\_ASD and C-Non ASD are samples from Dr. Weinberger's  
2 group.

3 **Supplementary Figure 4. Confirmation of allele-specific expression in postmortem**  
4 **brains.** Sanger sequencing of (a) *LRP2BP* in fetal cerebral cortex (C.C.) and adult  
5 cerebellum (C.B.) and frontal cortex (F.C.) (b) *ATP10A*, *DLGAP2*, *HTR2A* and *DUSP22*  
6 in fetal cerebral cortex (C.C.).

7 **Supplementary Figure 5. Confirmation of known human imprinted genes in the**  
8 **postmortem PFC of the offspring without ASD.** PEG = paternally expressed gene.  
9 MEG = maternally expressed gene. "Consistent" indicates the imprinting status was the  
10 same as that of known imprinted genes. "Inconsistent" indicates the imprinting status was  
11 not the same as that of known imprinted genes or could not be interpreted due to lack of  
12 SNPs.

13 **Supplementary Figure 6. Transcriptomic comparison between human BA8 and**  
14 **BA10.** (a) Data distribution prior to cross-platform normalization. (b) PCA analysis of  
15 different regions of the central nervous system. (c) Heatmap of all genes in the tested  
16 samples. (d) (Left) heatmap of all up-regulated genes (n=1,069) shown in fig. 1b. (Right)  
17 heatmap of all up-regulated ASD-susceptibility genes (n=89) shown in fig. 2a. (e) Volcano  
18 plot analysis of up-regulated normal and ASD-susceptibility genes. (f) (Left) heatmap of  
19 all down-regulated genes (n=2,731) shown in fig. 1b. (Right) heatmap of all down-  
20 regulated ASD-susceptibility genes (n=185) shown in fig. 2a. (g) Volcano plot analysis of  
21 down-regulated normal and ASD-susceptibility genes. FC: fold change; FDR: false  
22 discovery rate. Genes which were not expressed (mean expression < 0.1 normalized  
23 signal or FPKM in both samples) were discarded.

- 1 **Supplementary Table 1. Summary of the family quartet with ASD, the family trio**
- 2 **and tissues for supplementary figure 4**
- 3 **Supplementary Table 2. Gene information for heatmap clustering**
- 4 **Supplementary Table 3. Summary of GO analysis of altered genes**
- 5 **Supplementary Table 4. Gene information for stringent criteria**
- 6 **Supplementary Table 5. Gene information of the comparison between our study**
- 7 **ASD cohort and raw data of an ASD cohort obtained from Dr. Weinberg's group**
- 8 **Supplementary Table 6. Gene information of the comparison between our study**
- 9 **ASD cohort and raw data of an ASD cohort obtained from Dr. Geschwind's group**
- 10 **Supplementary Table 7. miRNA information for heatmap clustering**
- 11 **Supplementary Table 8. Summary of GO analysis of altered miRNAs**
- 12 **Supplementary Table 9. List of targeted genes by altered miRNAs**
- 13 **Supplementary Table 10. List of autism susceptibility genes from SFARI**
- 14 **Supplementary Table 11. Gene information for heatmap clustering**
- 15 **Supplementary Table 12. List of autism susceptibility miRNAs and their target**
- 16 **genes**
- 17 **Supplementary Table 13. Ratios of ASE of all genes**
- 18 **Supplementary Table 14. Gene information of heatmap clustering**
- 19 **Supplementary Table 15. List of imprinted genes from Geneimprint website**

- 1 **Supplementary Table 16. miRNA information for heatmap clustering**
- 2 **Supplementary Table 17. List of confirmed imprinted genes in postmortem PFC of**  
3 **the offspring without ASD**
- 4 **Supplementary Table 18. Gene information for transcriptomic comparison between**  
5 **human BA8 and BA10 (supplementary figure 6)**
- 6 **Supplementary Table 19. Primer information for genes**
- 7 **Supplementary Table 20. Primer information for miRNAs**

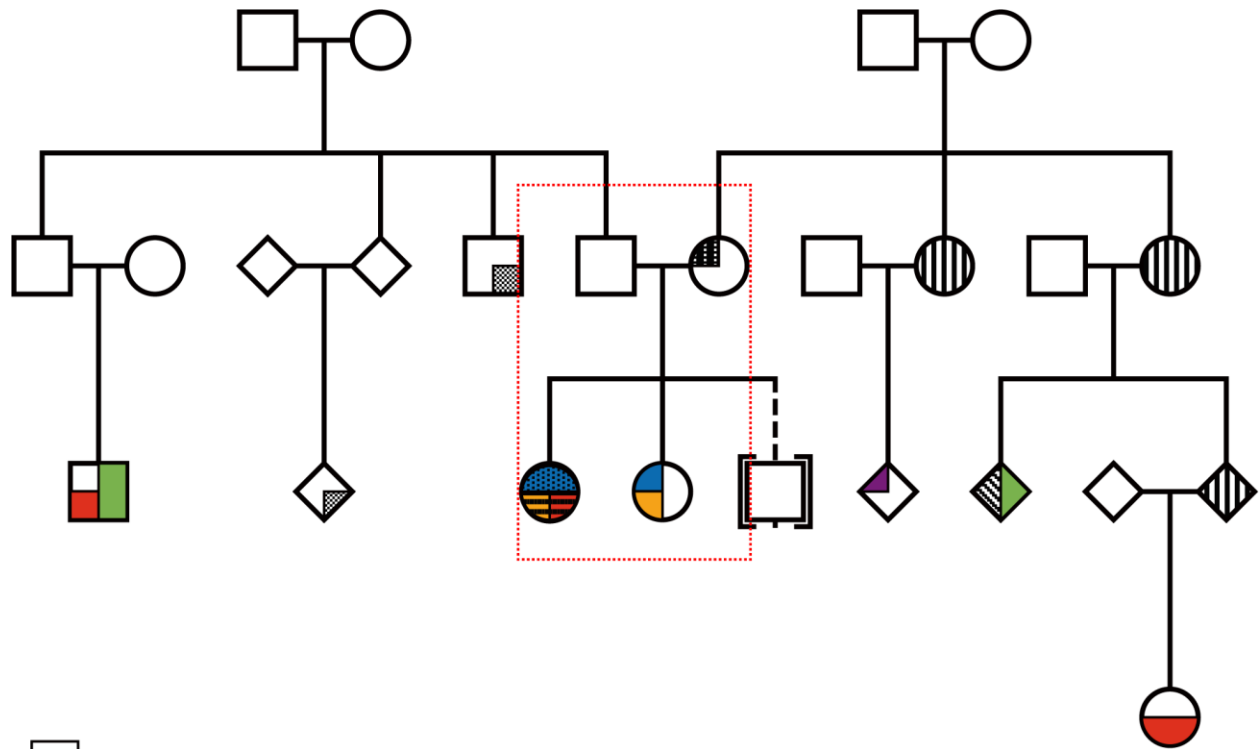

-  autism
-  intellectual disability
-  congenital deafness
-  epilepsy
-  bipolar disorder
-  obsessive compulsive trait
-  Down syndrome
-  adult-onset hearing loss
-  attention deficient disorder
-  depression
-  history of megacolon

Figure S1

**a**

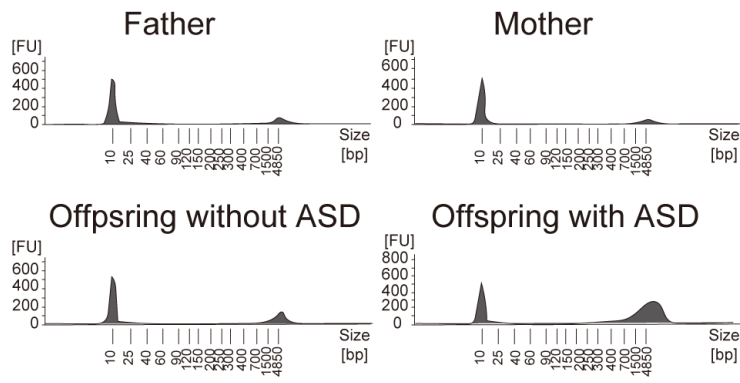

**b**

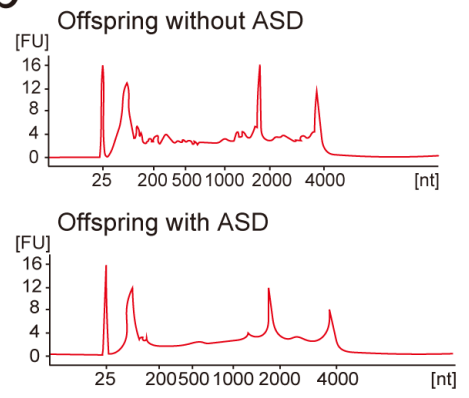

Figure S2

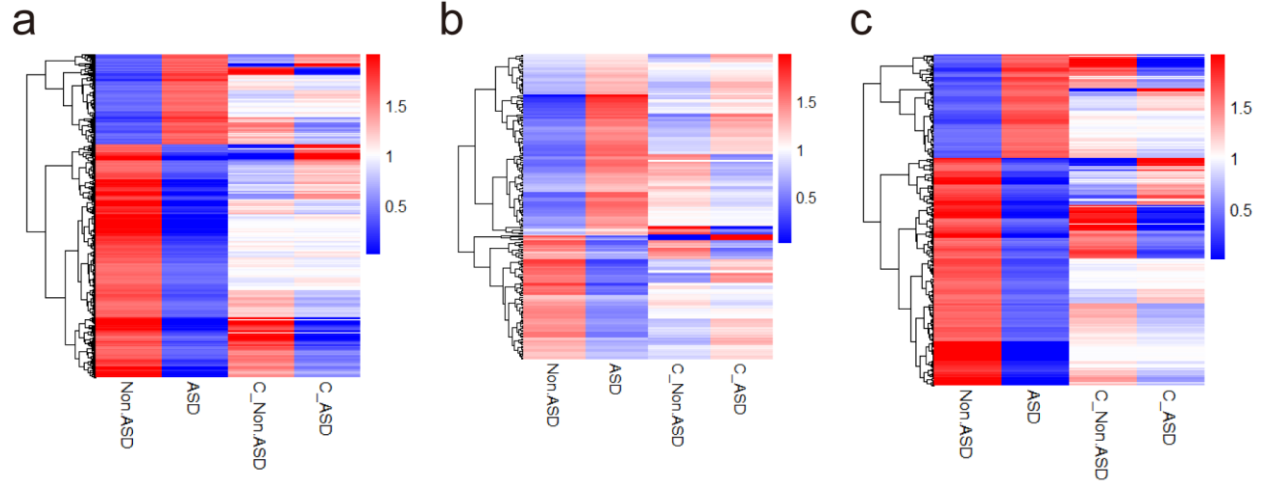

Figure S3



a

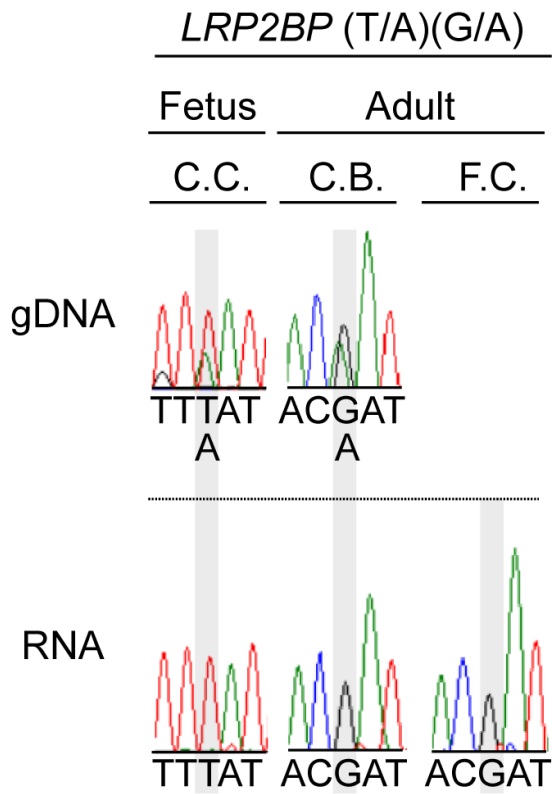

Figure S4

b

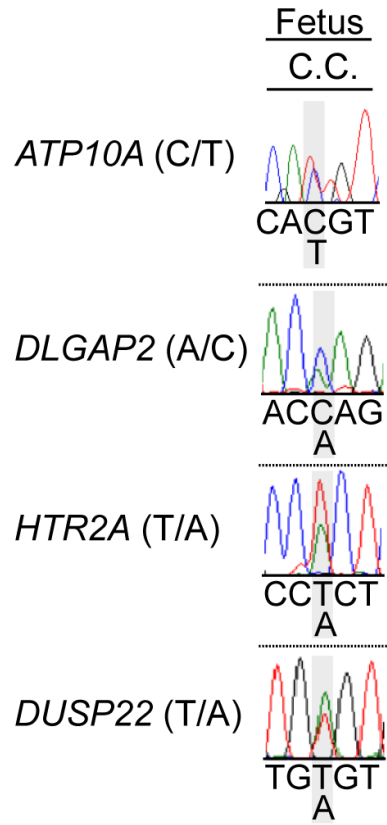

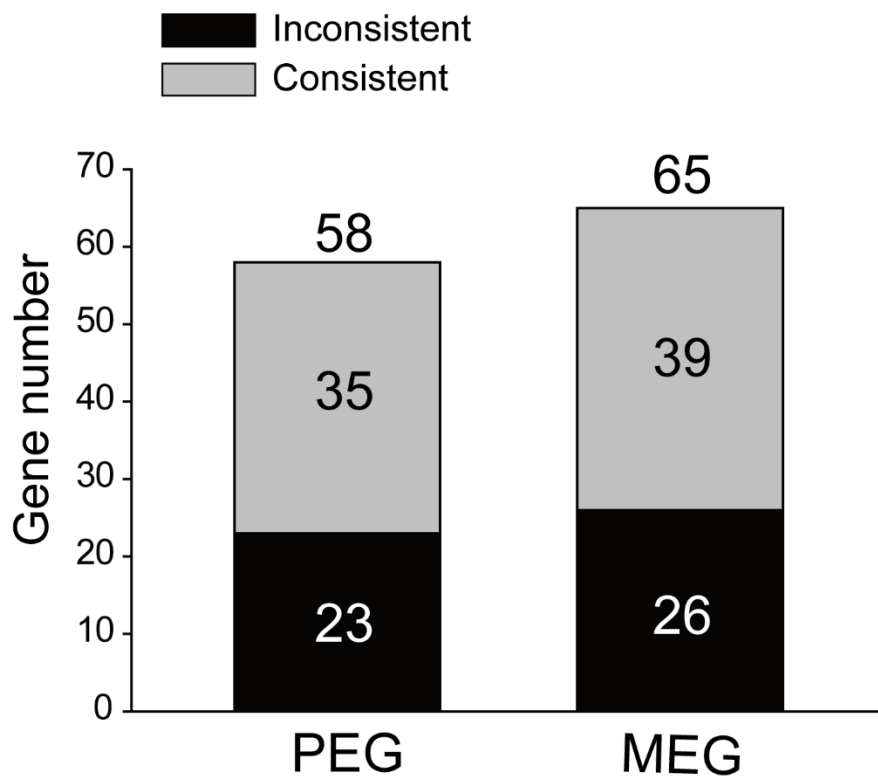

Figure S5

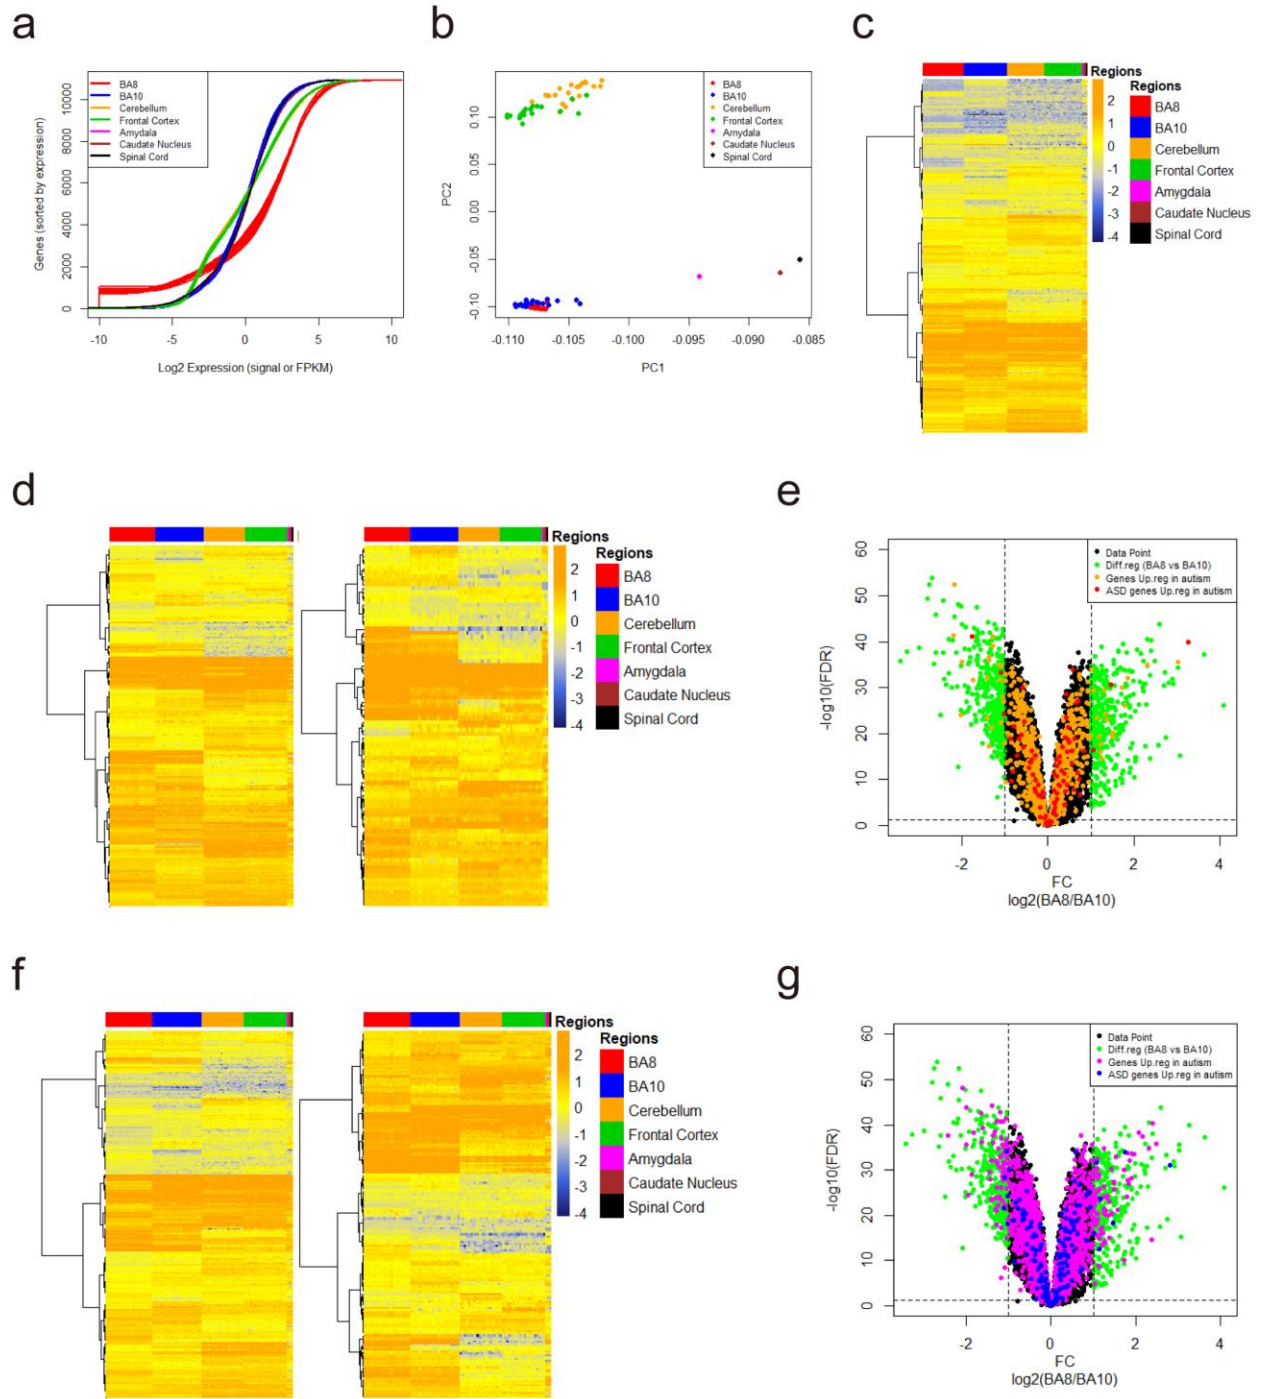

Figure S6

## References:

- 1 R: A language and environment for statistical computing. (R Foundation for Statistical Computing, Vienna, Austria., 2016).
- 2 Wright, C. *et al.* Altered expression of histamine signaling genes in autism spectrum disorder. *Translational psychiatry* **7**, e1126, doi:10.1038/tp.2017.87 (2017).
- 3 Weis, S. *et al.* Quality control for microarray analysis of human brain samples: The impact of postmortem factors, RNA characteristics, and histopathology. *Journal of neuroscience methods* **165**, 198-209, doi:10.1016/j.jneumeth.2007.06.001 (2007).
- 4 Koppelkamm, A., Vennemann, B., Lutz-Bonengel, S., Fracasso, T. & Vennemann, M. RNA integrity in post-mortem samples: influencing parameters and implications on RT-qPCR assays. *Int J Legal Med* **125**, 573-580, doi:10.1007/s00414-011-0578-1 (2011).
